# Supplementary material for: Different nitrogen uptake patterns of plant and soil microorganisms in the forest-grassland transition zone on the Loess Plateau
Source: PubMed Central journal article supplement (PMC11790565; doi:10.3389/fpls.2024.1480517), 2025-01-21

**Different nitrogen acquisition patterns of plant and soil microorganisms in the forest-grassland transition zone on the Loess Plateau**

Lina Wang<sup>1</sup>, Xu Deng<sup>1</sup>, Ying Zhou<sup>2</sup>, Xueqi Geng<sup>2</sup>, Zeling Zhang<sup>2</sup>, Yakun Tang<sup>2\*</sup>

<sup>1</sup>College of Forestry, Northwest A&F University, Yangling, Shaanxi 712100, China; <sup>2</sup> State Key Laboratory of Soil Erosion and Dryland Farming on the Loess Plateau, Northwest A&F University, Yangling, Shaanxi 712100, China

**E-mail addresses for corresponding author (\*):**

Yakun Tang, E-mail: [yktang@nwafu.edu.cn](mailto:yktang@nwafu.edu.cn); Tel: 86-29-87081910; Fax: 86-10-64858099

**Figure. S1** Locations of the study region and four studied stands in the forest–grassland transition zone on the Loess Plateau, China.

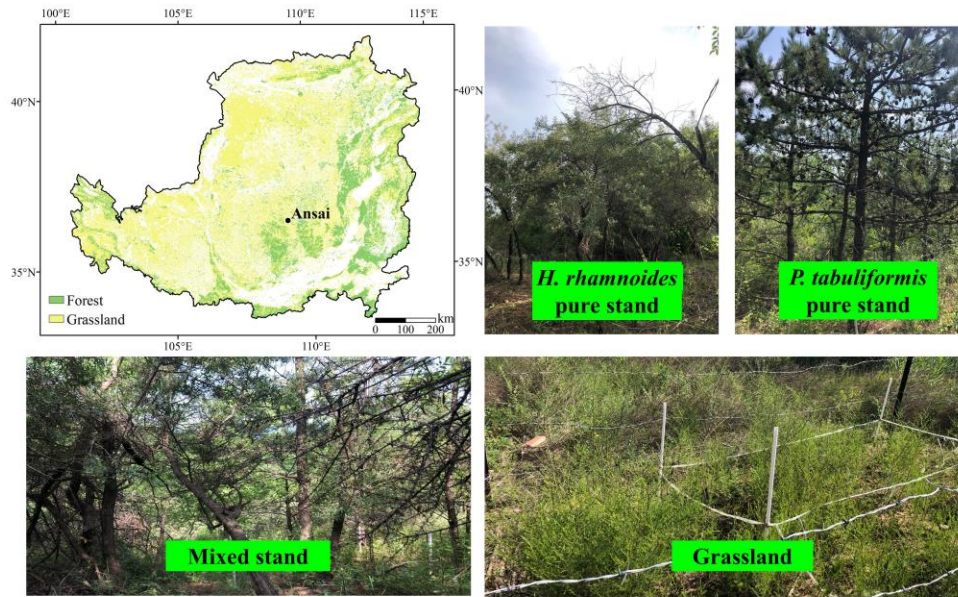

**Figure. S2** Rainfall (mm) and 0–50cm soil moisture content (%) in the four studied stands before and after <sup>15</sup>N labeling. Arrows represent the rainfall and moisture content at 3, 7, and 15 days after labeling.

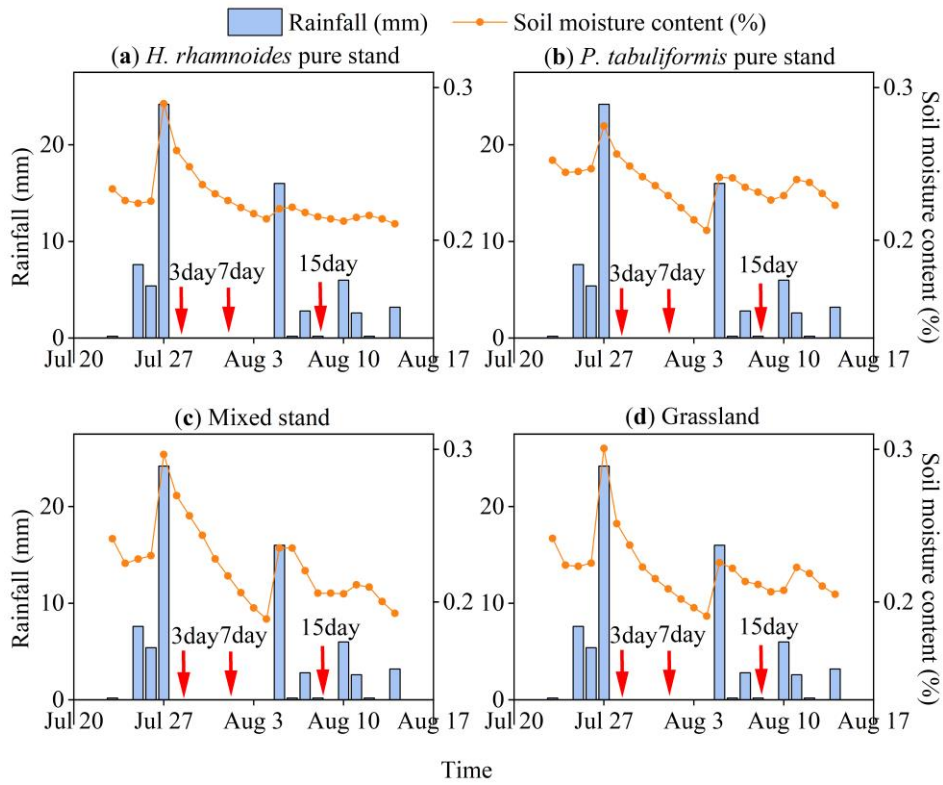

**Figure. S3** The average proportion of root surface area between 0–20 cm, 20–50 cm, 50–100 cm in the range of 0–100 cm in the four studied stands (means  $\pm$  SE, n = 9).

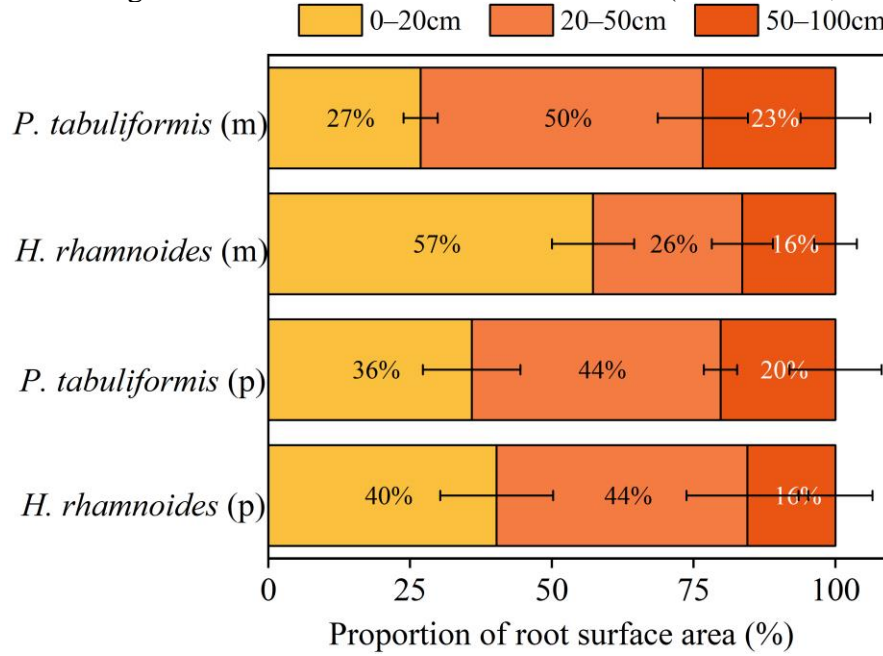

**Figure. S4** The  $\delta^{15}\text{N}$  of different plant organs in the tree stands of (a, b) *H. rhamnoides* and (c, d) *P. tabuliformis* (means  $\pm$  SE, n = 3). Asterisks indicate significant differences in the  $^{15}\text{N}$  enrichment between N forms within each stand (ANOVA and repeated measurements. \*,  $P < 0.05$ ; \*\*,  $P < 0.01$ ). D: Time since  $^{15}\text{N}$  labeling (day); L: The form of applied  $^{15}\text{N}$ –labeled N. (p) and (m) represent pure and mixed stands, respectively.

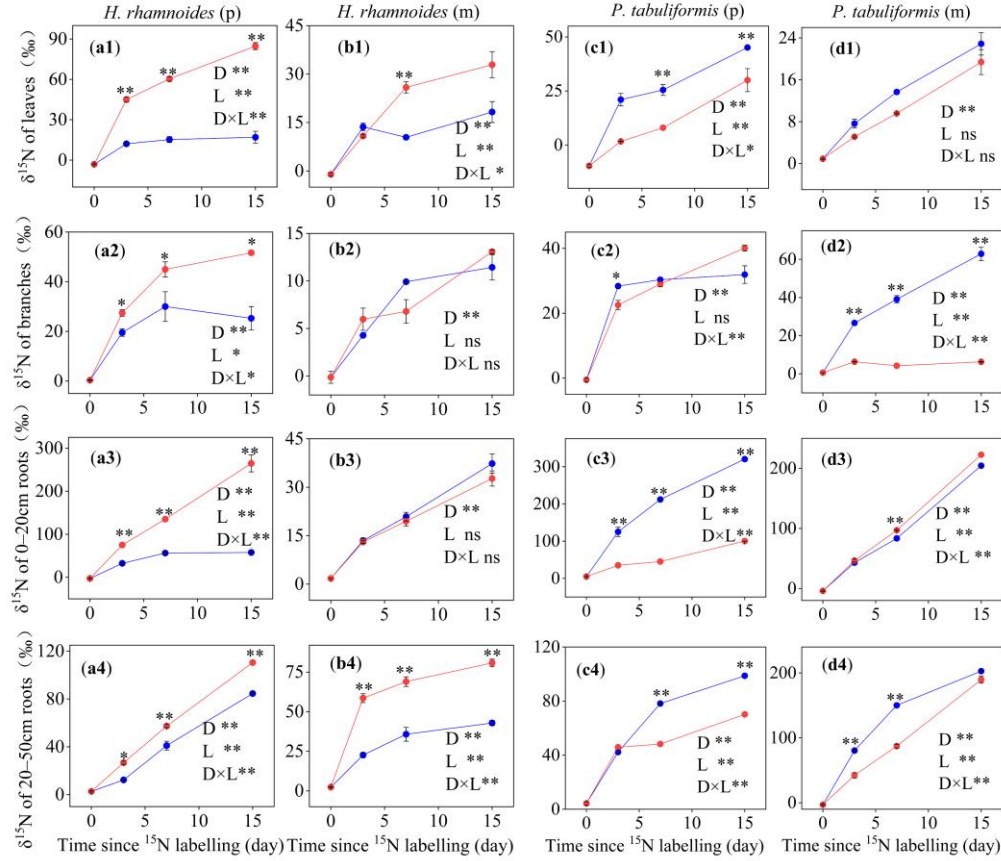

**Figure. S5** Uptake rates of  $^{15}\text{N}$  tracer of leaves, branches, fine roots collected from 0–20 cm, 20–20 cm, and 0–50 cm soil in the tree stands of (a, b) *H. rhamnoides* and (c, d) *P. tabuliformis* (means  $\pm$  SE, n = 3). Asterisks indicate significant differences in the  $^{15}\text{N}$  uptake rates between N forms within each stand (ANOVA and repeated measurements. \*,  $P < 0.05$ ; \*\*,  $P < 0.01$ ). D: Time since  $^{15}\text{N}$  labeling (day); L: The form of applied  $^{15}\text{N}$ -labeled N. (p) and (m) represent pure and mixed stands, respectively.

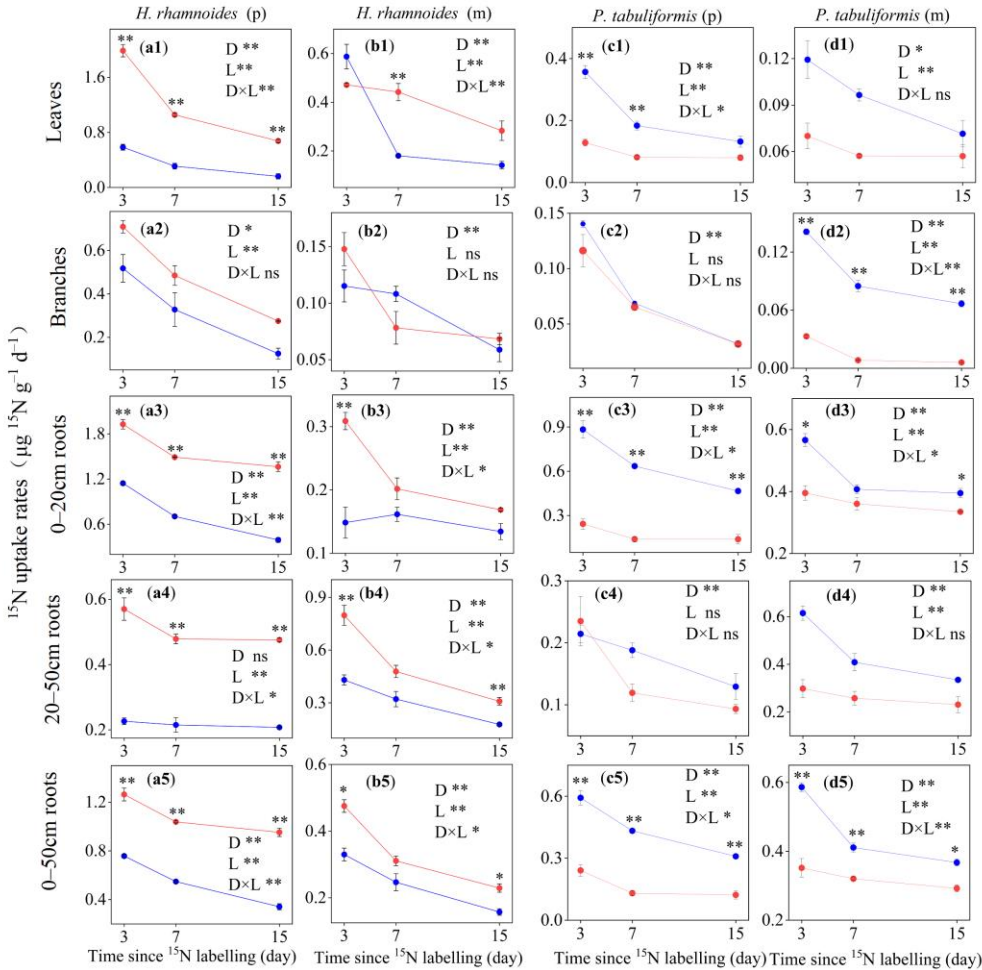

**Figure. S6** The  $\delta^{15}\text{N}$  and uptake rates of  $^{15}\text{N}$  tracer of leaves (a, c) and fine roots (b, d) in *A. gmelinii* stand (means  $\pm$  SE,  $n = 3$ ). Asterisks indicate significant differences in the  $^{15}\text{N}$  uptake rates between N forms within each stand (ANOVA and repeated measurements. \*,  $P < 0.05$ ; \*\*,  $P < 0.01$ ). D: Time since  $^{15}\text{N}$  labeling (day); L: The form of applied  $^{15}\text{N}$ -labeled N.

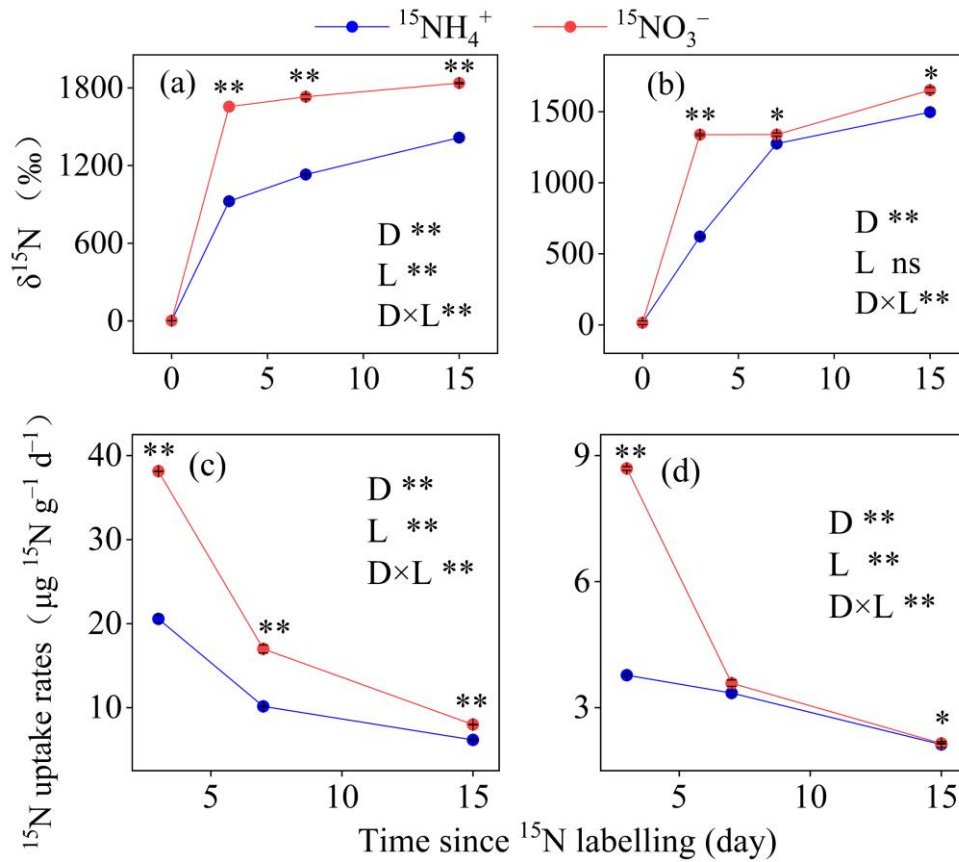

**Figure. S7** The relative proportion of  $^{15}\text{NH}_4^+$  and  $^{15}\text{NO}_3^-$  to total  $^{15}\text{N}$  tracer uptake by the whole plant in the four stands of (a, d) *H. rhamnoides*, (b, e) *P. tabuliformis* and (c) *A. gmelinii* at 3, 7 and 15 days after  $^{15}\text{N}$  labeling, respectively (shown are N-pool-weighted mean by roots, leaves and branches,  $n = 3$ ). (p) and (m) represent pure and mixed stands, respectively.

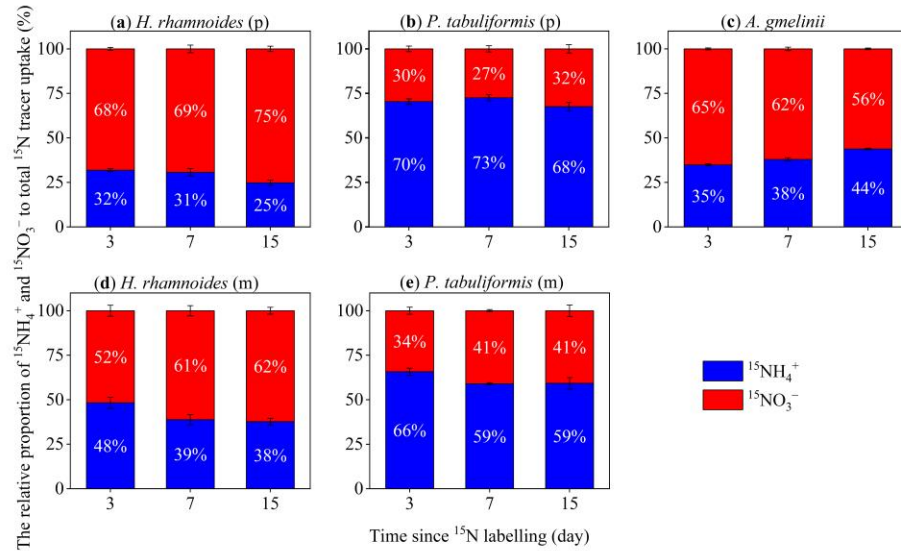



**Figure. S8** The relative proportion of  $^{15}\text{NH}_4^+$  and  $^{15}\text{NO}_3^-$  to total  $^{15}\text{N}$  tracer uptake by different plant organs (roots, leaves and branches) and whole plant (N-pool-weighted mean) in four studied stands of (a, d) *H. rhamnooides*, (b, e) *P. tabuliformis* and (c) *A. gmelinii* at 3, 7 and 15 days after  $^{15}\text{N}$  labeling ( $n = 3$ ). (p) and (m) represent pure and mixed stands, respectively.

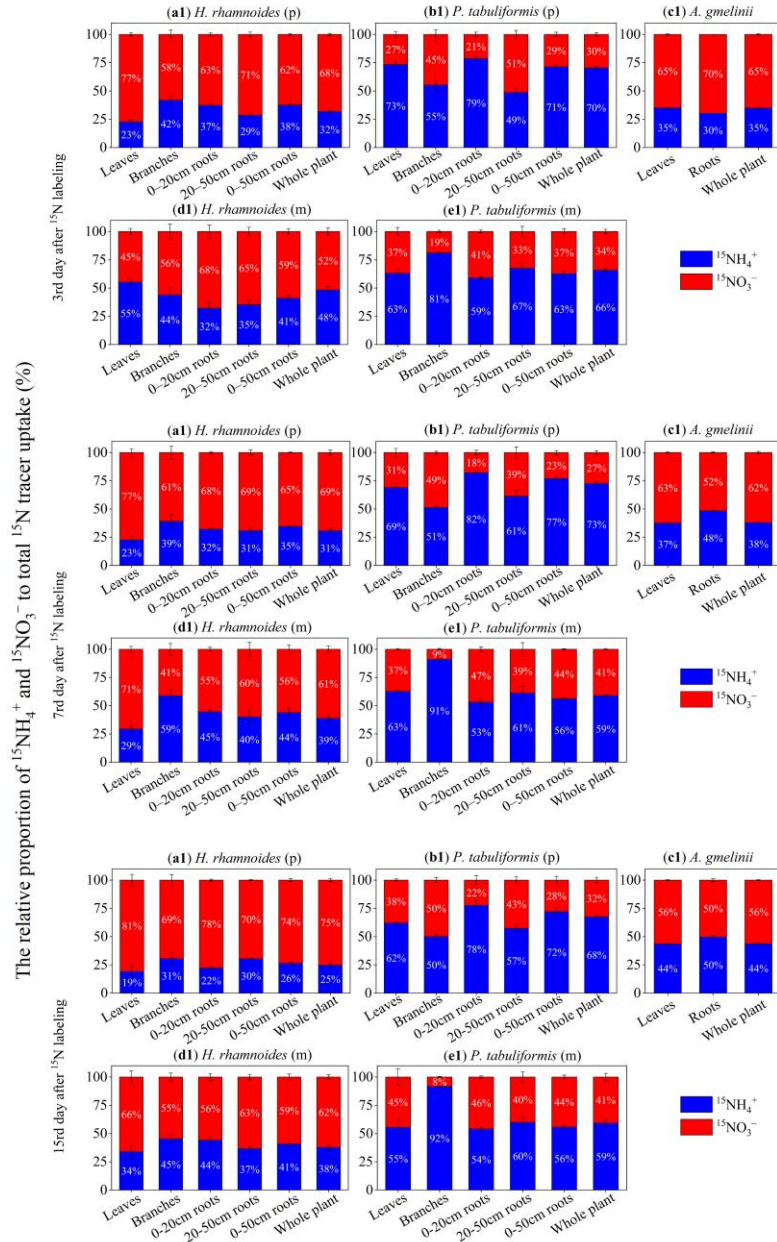

**Figure. S9** The relative proportion of  $^{15}\text{NH}_4^+$  and  $^{15}\text{NO}_3^-$  to total  $^{15}\text{N}$  tracer uptake by soil microorganisms in the four stands at 3, 7 and 15 days after  $^{15}\text{N}$  labeling, respectively (n = 3).

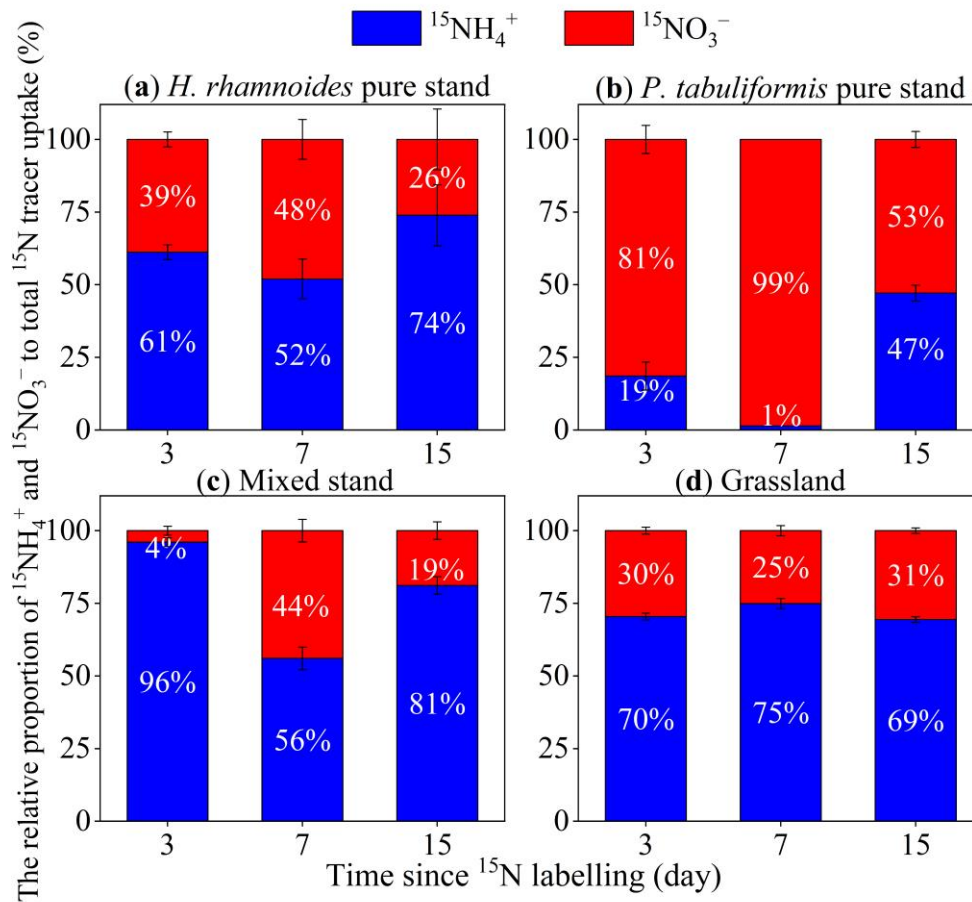

Supplement: DataSheet1.pdf [file DataSheet1.pdf]
