# Supplementary material for: Different nitrogen uptake patterns of plant and soil microorganisms in the forest-grassland transition zone on the Loess Plateau
Source: PubMed Central journal article supplement (PMC11790565; doi:10.3389/fpls.2024.1480517), 2025-01-21
Supplement: DataSheet2.pdf [file DataSheet2.pdf]

**Different nitrogen acquisition patterns of plant and soil microorganisms in the forest-grassland transition zone on the Loess Plateau**

Lina Wang<sup>1</sup>, Xu Deng<sup>1</sup>, Ying Zhou<sup>2</sup>, Xueqi Geng<sup>2</sup>, Zeling Zhang<sup>2</sup>, Yakun Tang<sup>2\*</sup>

<sup>1</sup>College of Forestry, Northwest A&F University, Yangling, Shaanxi 712100, China; <sup>2</sup> State Key Laboratory of Soil Erosion and Dryland Farming on the Loess Plateau, Northwest A&F University, Yangling, Shaanxi 712100, China

**E-mail addresses for corresponding author (\*):**

Yakun Tang, E-mail: [yktang@nwafu.edu.cn](mailto:yktang@nwafu.edu.cn); Tel: 86-29-87081910; Fax: 86-10-64858099

**Table S1** *F*-statistics of one-way ANOVA of the effects of applied N form ( $^{15}\text{NH}_4^+$ ,  $^{15}\text{NO}_3^-$ ) on soil  $\text{NH}_4^+$ ,  $\text{NO}_3^-$ , inorganic N, and total N concentrations in the four studied stands (n = 3).

| Soil layer<br>(cm) | N concentration<br>(mg/L)       | <i>H. rhamnoides</i> pure stand |       | <i>P. tabuliformis</i> pure stand |       | Mixed stand |       | Grassland |       |
|--------------------|---------------------------------|---------------------------------|-------|-----------------------------------|-------|-------------|-------|-----------|-------|
|                    |                                 | F                               | P     | F                                 | P     | F           | P     | F         | P     |
| 0–20               | $\text{NO}_3^-$                 | 1.581                           | 0.231 | 1.956                             | 0.159 | 1.121       | 0.368 | 1.607     | 0.225 |
|                    | $\text{NH}_4^+$                 | 2.868                           | 0.067 | 0.676                             | 0.578 | 2.303       | 0.114 | 1.251     | 0.322 |
|                    | $\text{NO}_3^- + \text{NH}_4^+$ | 2.890                           | 0.066 | 2.227                             | 0.122 | 1.415       | 0.273 | 1.213     | 0.335 |
| 20–50              | $\text{NO}_3^-$                 | 1.052                           | 0.395 | 1.056                             | 0.394 | 1.176       | 0.348 | 1.880     | 0.171 |
|                    | $\text{NH}_4^+$                 | 2.244                           | 0.120 | 0.787                             | 0.518 | 1.024       | 0.407 | 0.819     | 0.501 |
|                    | $\text{NO}_3^- + \text{NH}_4^+$ | 2.820                           | 0.070 | 0.734                             | 0.546 | 0.845       | 0.488 | 0.609     | 0.618 |

**Table S2** Taking the dilution effect into account, the relative proportion of  $^{15}\text{NH}_4^+$  and  $^{15}\text{NO}_3^-$  to total  $^{15}\text{N}$  tracer uptake by the whole plant and microorganisms in the four stands at 3, 7, and 15 days after  $^{15}\text{N}$  labeling, respectively (shown are N-pool-weighted mean by roots, leaves, and branches, n = 3).

| Stands                               | Object                 | 3                    |                      | 7                    |                      | 15                   |                      |
|--------------------------------------|------------------------|----------------------|----------------------|----------------------|----------------------|----------------------|----------------------|
|                                      |                        | $^{15}\text{NH}_4^+$ | $^{15}\text{NO}_3^-$ | $^{15}\text{NH}_4^+$ | $^{15}\text{NO}_3^-$ | $^{15}\text{NH}_4^+$ | $^{15}\text{NO}_3^-$ |
| <i>H. rhamnoides</i><br>pure stand   | <i>H. rhamnoides</i>   | 28.60(0.80)          | 71.40(0.80)          | 27.47(2.00)          | 72.53(2.00)          | 22.02(1.36)          | 77.98(1.36)          |
|                                      | Microorganisms         | 57.45(3.24)          | 42.55(3.24)          | 48.32(8.44)          | 51.68(8.44)          | 83.05(7.30)          | 16.95(7.30)          |
| <i>P. tabuliformis</i><br>pure stand | <i>P. tabuliformis</i> | 76.06(1.35)          | 23.94(1.35)          | 77.93(1.49)          | 22.07(1.49)          | 73.56(2.09)          | 26.44(2.09)          |
|                                      | Microorganisms         | 23.10(7.10)          | 76.90(7.10)          | 47.08(2.31)          | 52.92(2.31)          | 59.07(10.42)         | 40.93(10.42)         |
| Mixed stand                          | <i>H. rhamnoides</i>   | 27.23(1.72)          | 72.77(1.72)          | 33.32(0.59)          | 66.68(0.59)          | 33.13(2.93)          | 66.87(2.93)          |
|                                      | <i>P. tabuliformis</i> | 43.54(3.09)          | 56.46(3.09)          | 53.18(2.98)          | 46.82(2.98)          | 54.33(1.99)          | 45.67(1.99)          |
| Grassland                            | Microorganisms         | 98.87(4.95)          | 1.13(4.95)           | 47.90(4.75)          | 52.10(4.75)          | 75.70(4.44)          | 24.30(4.44)          |
|                                      | <i>A. gmelinii</i>     | 33.93(0.54)          | 66.07(0.54)          | 36.96(0.97)          | 63.04(0.97)          | 42.77(0.45)          | 57.23(0.45)          |
|                                      | Microorganisms         | 69.62(1.47)          | 30.38(1.47)          | 74.16(2.17)          | 25.84(2.17)          | 68.58(1.19)          | 31.42(1.19)          |

Each Value is presented as mean value with SE in parentheses.
